1 **Full title:**

2 Real-world Experience with Favipiravir for Treatment of COVID-19 in Thailand:  
3 Results from a Multicenter Observational Study

4

5 **Authors:**

6 Pinyo Rattanaumpawan<sup>1</sup>; Supunee Jirajariyavej<sup>2</sup>; Kanokorn Lerdlamyong<sup>3</sup>; Nattawan  
7 Palavutitotai<sup>4</sup>; Jatuporn Saiyarin<sup>5</sup>

8

9 **Affiliations:**

10 <sup>1</sup>Division of Infectious Diseases and Tropical Medicine, Department of Medicine,  
11 Faculty of Medicine Siriraj Hospital, Bangkok, Thailand

12 <sup>2</sup>Internal Medicine Unit, Taksin Hospital, Bangkok, Thailand

13 <sup>3</sup>Internal Medicine Unit, Vachira Phuket Hospital, Phuket, Thailand

14 <sup>4</sup>Internal Medicine Unit, Lerdsin Hospital, Bangkok, Thailand

15 <sup>5</sup>Internal Medicine Unit, Central Hospital, Bangkok, Thailand

16

17 **Correspondence to:**

18 Pinyo Rattanaumpawan, MD, MSCE, PhD

19 2 Wanglang Road, Bangkoknoi,

20 Bangkok 10700, Thailand

21 Tel: (+66) 2-419-7784; Fax: (+66) 2-419-7783

22 E-mail: pinyo.rat@mahidol.ac.th

23

24 **Running title:** Favipiravir Therapy for COVID-19

25

26 **Keywords:** COVID-19, Favipiravir, Pneumonia

27

28 **Abstract word count:** 245

29

30 **Manuscript word count:** 2338

31

32 **Tables:** 3

33

34 **Figure:** 1

35

36

37

38

39

40

41

42

43

44

45

46

47

48

49

50

51 **SYNOPSIS**

52 **Background.** Favipiravir is a broad-spectrum oral antiviral agent that shows in vitro activity  
53 against SARS-CoV-2. Presently, data on the effectiveness and optimal dosage of favipiravir  
54 for treating COVID-19 is limited.

55 **Methods.** We conducted a retrospective observational study of hospitalized adult patients  
56 with COVID-19 at five tertiary care hospitals in Thailand. We reviewed patient charts to  
57 obtain all necessary data.

58 **Results.** Among 247 COVID-19 patients, 63 (23.0%) received  $\geq 1$  dose of favipiravir. Of  
59 these, 27.0% required an O<sub>2</sub>-nasal cannula, 9.5% required non-invasive ventilation and/or  
60 high-flow O<sub>2</sub>-therapy, and 6.4% required invasive mechanical ventilation and/or ECMO. The  
61 median baseline NEWS2 score was 5(0–16). The Day-7 clinical improvement rate [95%CI]  
62 was 66.7%[53.7–78.0%] in all patients, 92.5%[75.7%–99.1%] in patients who did not require  
63 O<sub>2</sub>-supplementation, and 47.2%[0.4%–64.5%] in patients who required O<sub>2</sub>-supplementation.  
64 No life-threatening adverse events were identified. The 28-day mortality rate was 4.8%.  
65 Multivariate analysis revealed three poor prognostic factors for Day-7 clinical improvement  
66 [odds ratio (95%CI); *p*-value]: older age [0.94 (0.89–0.99); *p*=0.04], higher baseline NEWS2  
67 score [0.64 (0.47–0.88); *p*=0.006], and lower favipiravir loading dose ( $\leq 45$  mg/kg/day) [0.04  
68 (0.005–0.4); *p*=0.006].

69 **Conclusions.** Our study reports the promising effectiveness of favipiravir for treating  
70 COVID-19 patients. In addition to older age and a high baseline NEWS2 score, a low loading  
71 dose of favipiravir ( $\leq 45$  mg/kg/day) was also identified as a poor prognostic factor for early  
72 clinical improvement. Further studies to explore the optimal dose and the optimal timing of  
73 drug initiation for favipiravir should be performed.

74

75

76 **INTRODUCTION**

77 As of 16-Jun-2020, a total of 7,941,791 COVID-19 cases with 434,796 deaths have been  
78 reported globally.<sup>1</sup> This pandemic disease is caused by a novel coronavirus, named severe  
79 acute respiratory syndrome coronavirus 2 (SARS-CoV-2). SARS-CoV-2 is a single-stranded  
80 RNA beta-coronavirus encoding an RNA-dependent RNA polymerase (RdRp) and proteases.  
81 Both RdRp and viral proteases are considered important targets for potentially therapeutic  
82 agents. Hundreds of clinical studies are actively investigating a variety of promising agents  
83 (e.g., remdesivir, favipiravir, lopinavir, hydroxychloroquine, and interferon-alpha)<sup>2</sup>; however,  
84 data on the efficacy of these potentially therapeutic agents are still limited.

85 Favipiravir, a purine nucleic acid analog, is a broad-spectrum oral antiviral agent that  
86 inhibits the *RdRp* of RNA viruses.<sup>3</sup> This agent shows in vitro activity against many RNA  
87 viruses, including arenaviruses, bunyaviruses, flaviviruses, Ebola virus, and influenza virus,  
88 as well as SARS-CoV-2.<sup>4,5</sup> Currently, two registered clinical studies of favipiravir among  
89 COVID-19 patients have already reported their results.<sup>6</sup> The first study  
90 (ChiCTR2000029600) was a small, open-label, nonrandomized control study of 80 patients  
91 with COVID-19 conducted to compare the efficacy of favipiravir plus aerosolized interferon-  
92 alpha with that of lopinavir/ritonavir plus aerosolized interferon-alpha. In that study, the  
93 favipiravir group showed a significantly shorter time to viral clearance and a significantly  
94 higher improvement rate in chest imaging, after adjustment for potential confounders.<sup>7</sup> The  
95 second study (ChiCTR200030254) was a randomized control trial (RCT) of 240 patients with  
96 COVID-19 pneumonia. That study, currently available as a preprint on MedRxIV, reported a  
97 significantly higher clinical recovery rate on Day 7 in the favipiravir group compared with  
98 the arbidol group (71.43% vs. 55.86%;  $p = 0.02$ ).<sup>8</sup>

99 In February 2020, favipiravir was made available for use in Thailand under  
100 emergency procurement by the Department of Disease Control of Thailand. In early March

101 2020, Thailand national clinical practice guidelines (CPG) for COVID-19 management  
102 recommended the initiation of favipiravir therapy in only patients with severe COVID-19  
103 pneumonia (pneumonia with required high-flow O<sub>2</sub>-supplementation, non-invasive  
104 mechanical ventilation, or invasive mechanical ventilation to maintain a patient O<sub>2</sub>-saturation  
105 of 90% or more). In early May 2020, the national CPG were revised, and favipiravir is now  
106 also recommended for the treatment of mild pneumonia (i.e., abnormal chest-x-ray without  
107 desaturation). The benefits of early favipiravir initiation in mild COVID-19 cases are in need  
108 of further investigation.

109         The standard dose of favipiravir for treating influenza infection is 1600 mg twice  
110 daily on Day 1, followed by 600 mg twice daily on Days 2–5.<sup>9</sup> A maximal loading dose of  
111 3000 mg twice daily on Day 1 and a maintenance dose of 1200 mg twice daily on Days 2–9  
112 were safely used in a previous Ebola study.<sup>10</sup> Given that the optimal dose of favipiravir for  
113 treating COVID-19 is still uncertain, the Thailand national CPG recommend a fixed loading  
114 dose of 1600 mg twice daily on Day 1, followed by 600 mg twice daily on Days 2–10. A  
115 higher loading dose (60 mg/kg/day, MKD) and maintenance dose (20 MKD) are  
116 recommended in patients with a body mass index (BMI) of  $\geq 35$ .

117         Presently, data on the effectiveness and optimal dosage of favipiravir for treating  
118 COVID-19 is limited. Therefore, we conducted a retrospective study to explore these issues.

119

## 120 **MATERIALS AND METHODS**

### 121 **Study Design**

122 We conducted a retrospective observational study of COVID-19 patients who were  
123 hospitalized at any of five tertiary care hospitals in Thailand (i.e., Siriraj, Taksin, Vachira  
124 Phuket, Lerdsin, and Central hospitals) during 1 January – 30 April 2020. The study protocol

125 was approved with a waiver of informed consent by the institutional review boards of all  
126 involved hospitals.

### 127 **Inclusion and Exclusion Criteria**

128 We enrolled all hospitalized patients aged at least 18 years who had reverse transcription  
129 PCR-confirmed SARS-CoV-2 based on a respiratory specimen (nasopharyngeal,  
130 oropharyngeal, sputum, endotracheal aspirate, or bronchoalveolar lavage sample) and  
131 received at least one dose of favipiravir. Patients who expired or were discharged from the  
132 hospital within 24 hours after hospitalization were excluded.

### 133 **Data Collection and Study Definition**

134 We reviewed patient charts to obtain all necessary data, including demographic data, clinical  
135 data, laboratory data, and the hospital stay length. We also recorded the daily National Early  
136 Warning Score 2 (NEWS2 score). Details regarding the NEWS2 score have been published  
137 elsewhere.<sup>11</sup> The primary outcome was the rate of clinical improvement within seven days of  
138 favipiravir therapy (Day-7 clinical improvement), and the secondary outcomes were the Day-  
139 14 and Day-28 clinical improvement rates.

140 Clinical improvement was defined as a one-point reduction in baseline status (on the  
141 first day of favipiravir therapy) on a six-point disease severity scale at the time of evaluation.  
142 The six-point disease severity scale was categorized as follows: 6-death; 5-hospitalization for  
143 extracorporeal membrane oxygenation (ECMO) or mechanical ventilation; 4-hospitalization  
144 for non-invasive ventilation or high-flow O<sub>2</sub>-therapy; 3-hospitalization for supplemental O<sub>2</sub>;  
145 2-hospitalization without the need for O<sub>2</sub>-supplementation but requiring ongoing medical  
146 care; and 1-discharge or normalization of all vital signs and saturation of peripheral O<sub>2</sub> of  
147 >94% on room air for at least 24 hours.

148

149

## 150 **Statistical Analysis**

151 Categorical variables are summarized by frequency and percentage, whereas  
152 continuous variables are summarized by the median and range. Univariate analyses were  
153 performed using the Fisher-exact test for categorical data. The Mann-Whitney U test was  
154 used for continuous data. To identify the factors independently associated with the Day-7  
155 clinical improvement, we performed a subsequent multivariate analysis including all  
156 potentially significant variables with a  $p$ -value of  $\leq 0.20$  in a stepwise fashion.

157 For all calculations, a two-tailed  $p$ -value of  $< 0.05$  was considered statistically  
158 significant. All calculations were performed using STATA version 14.1 (Stata Corp, College  
159 Station TX).

160

## 161 **RESULTS**

162 During the study period, there were a total of 274 COVID-19 patients hospitalized in the  
163 participating hospitals, of which 63 patients (23.0%) received favipiravir. The baseline  
164 demographics and characteristics of all patients are listed in Table 1.

165 The median age of favipiravir-treated COVID-19 patients was 48 (22–85) years, and  
166 39 of these patients (61.9%) were male. Most patients had fever (87.3%), sore throat (69.8%),  
167 or cough (74.6%) as the clinical presentation. The median duration between the symptom  
168 onset and the admission date was 6 (0–28) days, while the median duration between the  
169 symptom onset and the first day of favipiravir therapy was 8 (0–28) days.

170 At baseline (Day 1 of favipiravir therapy), 17 patients (27.0%) required O<sub>2</sub>-  
171 supplementation via nasal cannula, 6 patients (9.5%) required non-invasive ventilation and/or  
172 high-flow O<sub>2</sub>-therapy, and 4 patients (6.4%) required invasive mechanical ventilation and/or  
173 ECMO, while the remainder did not required O<sub>2</sub>-supplementation. The median baseline  
174 NEWS2 score was 5 (0–16).

175 The median loading dose of favipiravir was 47.4 (29.1–71.1) MKD, and one-third of  
176 enrolled patients (33.3%) received a loading dose of  $\leq 45$  MKD. The median maintenance  
177 dose of favipiravir was 17.9 (10.9–26.7) MKD, and 76.2% of the subjects received a  
178 maintenance dose of  $\leq 15$  MKD. The median duration of favipiravir therapy was 12 (2–17)  
179 days. Within two days of initiating favipiravir treatment, nearly all patients were prescribed a  
180 chloroquine-based agent (98.4%) and a protease inhibitor (96.8%); half of them also received  
181 azithromycin (49.2%). Only a few patients received a steroid (12.7%) or tocilizumab (6.4%)  
182 at this time.

### 183 **Hospital Course and Treatment Outcomes**

184 Details regarding the hospital course and treatment outcomes are shown in Table 2. The Day-  
185 7, Day-14, and Day-28 clinical improvement rates, stratified by the requirement for O<sub>2</sub>-  
186 supplementation are depicted in Figure 1. The Day-7 clinical improvement rate [95% CI] was  
187 66.7% [53.7–78.0%] in all patients, 92.5% [75.7–99.1%] in patients who did not require O<sub>2</sub>-  
188 supplementation (a six-point disease severity scale score of 1–2), and 47.2% [0.4–64.5%] in  
189 patients who required O<sub>2</sub>-supplementation (a six-point severity scale score of 3–5). The Day-  
190 14 clinical improvement rates for all patients, those who did not require O<sub>2</sub>-supplementation,  
191 and those who required O<sub>2</sub>-supplementation were 85.7% [74.6%–93.2%], 100.0% [87.2%–  
192 1.00%], and 75.0% [57.8%–87.9%], respectively. Nearly all patients who required O<sub>2</sub>-  
193 supplementation (96.1%) had clinical improvement within 28 days.

194 Of the 63 favipiravir-treated patients, four patients required invasive mechanical  
195 ventilation or ECMO on Day 1 of therapy, and four more cases subsequently required  
196 invasive mechanical ventilation (two cases on Day 6 and two cases on Day 9 of therapy). The  
197 14-day, 28-day, and in-hospital mortality rates were 1.6%, 4.8%, and 7.9%, respectively. The  
198 major cause of death was superimposed infection.



199 The most common adverse event was diarrhea (54.0%), follow by nausea/vomit  
200 (7.9%), hepatitis (6.4%), and QT interval prolongation in EKG (6.4%). None of these adverse  
201 events were life-threatening.

## 202 **Factors Associated with Day-7 Clinical Improvement**

203 To determine the factors associated with Day-7 clinical improvement, we compared patients  
204 with Day-7 clinical improvement (cases) with patients without Day-7 clinical improvement  
205 (controls). The characteristics of both groups are shown Table 1. The cases had a  
206 significantly lower age (47 vs. 59 years;  $p = 0.02$ ), a significantly lower BMI (25.0 vs. 27.9;  $p$   
207 = 0.04), a significantly lower baseline NEWS2 score (4 vs. 5;  $p = 0.003$ ), and a significantly  
208 lower baseline six-point disease severity scale score (2 vs. 3;  $p < 0.001$ ). Additionally, the  
209 baseline white blood cell count was significantly lower in the case group (5420 vs. 6810;  $p =$   
210 0.03). Although the median loading and maintenance doses of favipiravir were not  
211 statistically different between these groups, the proportion of patients in the control group  
212 who received a lower loading dose of favipiravir ( $\leq 45$  MKD) trended higher compared with  
213 the case group (26.2% vs. 47.6%;  $p < 0.10$ ).

214 Table 3 shows the results of multivariate analysis. A multivariate analysis revealed three  
215 factors that were negatively associated with Day-7 clinical improvement [odds ratio (95%CI);  
216  $p$ -value]: older age [0.94 (0.89–0.99);  $p = 0.04$ ], higher baseline NEWS2 score [0.64 (0.47–  
217 0.88);  $p = 0.006$ ], and a lower prescribed loading dose of favipiravir ( $\leq 45$  MKD) [0.04  
218 (0.005–0.4);  $p = 0.006$ ].

219

## 220 **DISCUSSION**

221 The Day-7 clinical improvement rate from our study was 67.7%, which is slightly lower than  
222 the Day-7 clinical recovery rate from the abovementioned RCT of favipiravir (71.4%).<sup>8</sup>

223 However, there were a few differences between these two studies. First, the definition of

224 clinical recovery used in the abovementioned RCT was based mainly on clinical symptoms  
225 (e.g., fever, cough), whereas the definition of clinical improvement used in our study was  
226 based on improvement in oxygenation status. Our study included sicker patients with a higher  
227 proportion of patients who required mechanical ventilation (6.4%) as compared with the  
228 subjects of the unpublished RCT (0.9%). These differences may explain the slightly lower  
229 rate of favorable clinical responses observed in the present study.

230         Among the COVID-19 patients who did not require O<sub>2</sub>-supplementation, nearly all  
231 patients (92.6%) had clinical improvement within the first seven days of favipiravir therapy.  
232 However, only half of the patients who required O<sub>2</sub>-supplementation (47.2%) had clinical  
233 improvement within the first seven days of therapy. The rate of clinical improvement in these  
234 patients finally reached 75% on Day 14 and 83.3% on Day 28. Of the eight patients who  
235 required invasive mechanical ventilation or ECMO during their hospitalization, one patient  
236 died within the first 14 days. Therefore, the calculated 14-day mortality among this group  
237 was 12.5%. This number is similar to the 14-day mortality reported by a preliminary  
238 remdesivir RCT, in which 13 (10.4%) out of 125 patients who required mechanical  
239 ventilation or ECMO died.<sup>12</sup> Based on these findings, the effectiveness of favipiravir for  
240 treating COVID-19 is promising, but this drug can be slow acting in more severe cases.

241         Our study identified older age and a higher baseline NEWS2 scale as poor prognostic  
242 factors for early clinical response. These findings are compatible with the results from many  
243 previous publications.<sup>13-15</sup> We also explored other baseline variables (e.g., BMI,  
244 comorbidities); however the impact of those factors disappeared after the data were adjusted  
245 by the baseline NEWS2 scale.

246         Given that the optimal dose of favipiravir is still uncertain, we carefully explored the  
247 association between favipiravir dosage and patient outcome. Our study confirmed that a  
248 loading dose of favipiravir of  $\leq 45$  MKD was a poor prognostic factor for early clinical

249 response. Therefore, a fixed favipiravir loading dose of 1600 mg twice daily for all patients  
250 with a BMI of <35 may be suboptimal for patients with a BMI of <35 but a body weight of  
251  $\geq 70$  kg.

252 Our study has several strengths. First, this study was a very early study to explore the  
253 effectiveness of favipiravir in active clinical cases of COVID-19. Second, this study included  
254 patients with differing disease severities; the patients ranged from mild pneumonia cases who  
255 did not require O<sub>2</sub>-supplementation to patients with life-threatening pneumonia who required  
256 mechanical ventilation or ECMO. This diverse subject pool allowed us to thoroughly explore  
257 the effectiveness of favipiravir and the clinical course of COVID-19 disease in various  
258 degrees of severity. Lastly, the daily NEWS2 scores and six-point disease severity scale  
259 scores were carefully collected and analyzed. Consequently, we can report nearly all  
260 important clinical outcomes and compare our findings with those of other clinical trials.<sup>7, 8, 12</sup>

261 Our study also has some limitations. First, the retrospective design resulted in a  
262 significant amount of missing data, especially for laboratory values. To resolve this issue,  
263 when performing the multivariate analysis, missing data was replaced by the mean value of a  
264 given variable. Second, majority of our patients also received chloroquine-based agent and  
265 protease inhibitors. Therefore, the good treatment response among our patients may be the  
266 synergistic results of triple combination of favipiravir, chloroquine-based agent and protease  
267 inhibitors. Third, a sample size of 63 patients with COVID-19 pneumonia is not large enough  
268 to detect other associated factors with a low prevalence. Lastly, the generalizability of our  
269 findings may be an issue. Given that the study was conducted in tertiary care hospitals in  
270 Thailand, results may not be applicable to primary or secondary care settings or to COVID-  
271 19 patients in other countries.

272 In conclusion, our study reports the promising effectiveness of favipiravir for treating  
273 COVID-19 patients in a tertiary care hospital setting. No life-threatening adverse events were

274 identified. In addition to older age and a high baseline NEWS2 score, a low loading dose of  
275 favipiravir ( $\leq 45$  MKD) was also identified as a poor prognostic factor for early clinical  
276 improvement. Further studies to explore the optimal dose and the optimal timing of drug  
277 initiation for favipiravir should be performed.

278

279

280

281

282

283

284

285

286

287

288

289

290

291

292

293

294

295

296

297

298

299 **Notes.**

300 **Acknowledgments.** The authors gratefully acknowledge the study team at all involved  
301 hospitals for their assistance of this study. Siriraj hospital: Mrs. Surangkana Samanloh;  
302 Taksin hospital: Mrs. Duangruethai Jankiew, Dr. Kittipong Sae-lao and Ms. Potjana Chularat;  
303 Vachira Phuket hospital: Ms. Somruedee Chatchawej and Dr. Busaya Santisant; Lerdsin  
304 hospital: Ms. Pranee Watagulsin; Central hospital: Ms. Nattasin Pimhom and Ms. Pornsikan  
305 Charutchocksawat. Additionally, we thank Katie Oakley, PhD, from Edanz Group ([https://en-](https://en-author-services.edanzgroup.com/)  
306 [author-services.edanzgroup.com/](https://en-author-services.edanzgroup.com/)) for editing a draft of this manuscript.

307

308 **Financial support.** This research project was supported by Siriraj Research Fund, Grant  
309 number (IO) R016333038, Faculty of Medicine Siriraj Hospital, Mahidol University.

310

311 **Potential conflicts of interest.** The authors have no conflicts of interest to declare.

312

313 **Authors' contributions.** All authors made substantial contribution to the interpretation and  
314 analysis of data. The corresponding author had full access to the data and responsibility for  
315 the decision to submit the manuscript for publication.

316

317

318

319

320

321

322

323

324

325 **References**

- 326 1. World Health Organization. Coronavirus disease (COVID-19) Situation Report – 139.  
327 [https://www.who.int/docs/default-source/coronaviruse/situation-reports/20200607-covid-19-sitrep-](https://www.who.int/docs/default-source/coronaviruse/situation-reports/20200607-covid-19-sitrep-139.pdf?sfvrsn=79dc6d08_2)  
328 [139.pdf?sfvrsn=79dc6d08\\_2](https://www.who.int/docs/default-source/coronaviruse/situation-reports/20200607-covid-19-sitrep-139.pdf?sfvrsn=79dc6d08_2) (accessed June 8, 2020).
- 329 2. Srinivas P, Sacha G, Koval C. Antivirals for COVID-19. *Cleve Clin J Med* 2020.
- 330 3. Furuta Y, Komeno T, Nakamura T. Favipiravir (T-705), a broad spectrum inhibitor of viral  
331 RNA polymerase. *Proc Jpn Acad Ser B Phys Biol Sci* 2017; **93**: 449-63.
- 332 4. Furuta Y, Takahashi K, Kuno-Maekawa M et al. Mechanism of action of T-705 against  
333 influenza virus. *Antimicrob Agents Chemother* 2005; **49**: 981-6.
- 334 5. Bai CQ, Mu JS, Kargbo D et al. Clinical and Virological Characteristics of Ebola Virus  
335 Disease Patients Treated With Favipiravir (T-705)-Sierra Leone, 2014. *Clin Infect Dis* 2016; **63**:  
336 1288-94.
- 337 6. Du YX, Chen XP. Favipiravir: Pharmacokinetics and Concerns About Clinical Trials for  
338 2019-nCoV Infection. *Clin Pharmacol Ther* 2020.
- 339 7. Cai Q, Yang M, Liu D et al. Experimental Treatment with Favipiravir for COVID-19: An  
340 Open-Label Control Study. *Engineering (Beijing)* 2020.
- 341 8. Chang Chen, Jianying Huang, Zhenshun Cheng et al. Favipiravir versus Arbidol for COVID-  
342 19: A Randomized Clinical Trial. *medRxiv preprint* <https://doi.org/10.1101/2020031720037432> [e-pub  
343 ahead of print] 2020.
- 344 9. Wang Y, Fan G, Salam A et al. Comparative Effectiveness of Combined Favipiravir and  
345 Oseltamivir Therapy Versus Oseltamivir Monotherapy in Critically Ill Patients With Influenza Virus  
346 Infection. *J Infect Dis* 2020; **221**: 1688-98.
- 347 10. Nguyen TH, Guedj J, Anglaret X et al. Favipiravir pharmacokinetics in Ebola-Infected  
348 patients of the JIKI trial reveals concentrations lower than targeted. *PLoS Negl Trop Dis* 2017; **11**:  
349 e0005389.
- 350 11. Royal College of Physicians National Early Warning Score (NEWS) 2: Standardising the  
351 assessment of acute-illness severity in the NHS. Updated report of a working party London: RCP,  
352 2017.

- 353 12. Beigel JH, Tomashek KM, Dodd LE et al. Remdesivir for the Treatment of Covid-19 -  
354 Preliminary Report. *N Engl J Med* 2020.
- 355 13. Goyal P, Choi JJ, Pinheiro LC et al. Clinical Characteristics of Covid-19 in New York City. *N*  
356 *Engl J Med* 2020; **382**: 2372-4.
- 357 14. Grasselli G, Zangrillo A, Zanella A et al. Baseline Characteristics and Outcomes of 1591  
358 Patients Infected With SARS-CoV-2 Admitted to ICUs of the Lombardy Region, Italy. *JAMA* 2020.
- 359 15. Huang C, Wang Y, Li X et al. Clinical features of patients infected with 2019 novel  
360 coronavirus in Wuhan, China. *Lancet* 2020; **395**: 497-506.

361

362

363

364

365

366

367

368

369

370

371

372

373

374

375

376

377

378

379

380

381

382

383 **Table 1.** Baseline demographics and characteristics of all patients.

| Variables                                         | All (n = 63)     | Day 7 Clinical improvement |                  | p-value |
|---------------------------------------------------|------------------|----------------------------|------------------|---------|
|                                                   |                  | Yes (n = 42)               | No (n = 21)      |         |
| Age, median (range), year                         | 48 (22–85)       | 47 (23–72)                 | 59 (22–85)       | 0.02    |
| Male sex                                          | 39 (61.9%)       | 25 (59.5%)                 | 14 (66.7%)       | 0.78    |
| Body weight, median (range), kg                   | 69 (45–125)      | 68 (51–125)                | 76 (45–120)      | 0.08    |
| Body mass index median (range), kg/m <sup>2</sup> | 26.1 (19.0–43.8) | 25.0 (19.0–43.8)           | 27.9 (20.8–39.2) | 0.04    |
| <b>Duration between, median (range), day</b>      |                  |                            |                  |         |
| Symptom onset and admission date                  | 6 (0–28)         | 6 (0–28)                   | 8 (0–15)         | 0.08    |
| Admission date and Day-1 of favipiravir therapy   | 1 (-8–10)        | 1 (-3–10)                  | 0 (-8–5)         | 0.002   |
| Symptom onset and Day-1 of favipiravir therapy    | 8 (0–28)         | 8 (2–28)                   | 8 (0–11)         | 0.60    |
| <b>Exposure risk</b>                              |                  |                            |                  |         |
| Contact with confirmed COVID-19 cases             | 26 (41.3%)       | 19 (45.2%)                 | 7 (33.3%)        | 0.42    |
| Travel abroad                                     | 7 (11.1%)        | 5 (11.2%)                  | 2 (9.5%)         | 1.00    |
| Contact with a foreigner                          | 11 (17.5%)       | 8 (19.1%)                  | 3 (14.3%)        | 0.74    |
| Travel to a local area with clustered cases       | 38 (60.3%)       | 28 (66.7%)                 | 10 (47.6%)       | 0.18    |
| <b>Underlying diseases</b>                        |                  |                            |                  |         |
| Heart disease and hypertension                    | 9 (14.3%)        | 7 (16.7%)                  | 2 (9.5%)         | 0.71    |
| Diabetes mellitus                                 | 17 (27.0%)       | 11 (26.2%)                 | 6 (28.6%)        | 1.00    |
| Chronic lung disease                              | 4 (6.4%)         | 2 (7.1%)                   | 1 (4.8%)         | 1.00    |
| Chronic kidney disease                            | 4 (6.4%)         | 3 (7.1%)                   | 1 (4.8%)         | 1.00    |
| Chronic liver disease                             | 3 (4.8%)         | 3 (7.1%)                   | 0 (0%)           | 0.55    |
| Solid cancer                                      | 4 (6.4%)         | 2 (7.1%)                   | 1 (4.8%)         | 1.00    |
| Others                                            | 4 (6.4%)         | 2 (7.1%)                   | 2 (9.5%)         | 0.60    |
| <b>Clinical presentation upon admission</b>       |                  |                            |                  |         |
| Fever or body temperature of >37.5 °C             | 55 (87.3%)       | 36 (85.7%)                 | 19 (90.5%)       | 0.71    |



|                                                                                               |                            |                            |                            |        |
|-----------------------------------------------------------------------------------------------|----------------------------|----------------------------|----------------------------|--------|
| Sore throat                                                                                   | 44 (69.8%)                 | 27 (64.3%)                 | 17 (81.0%)                 | 0.25   |
| Rhinorrhea                                                                                    | 16 (25.4%)                 | 13 (31.0%)                 | 3 (14.3%)                  | 0.22   |
| Cough                                                                                         | 47 (74.6%)                 | 30 (71.4%)                 | 17 (81.0%)                 | 0.54   |
| Headache                                                                                      | 11 (17.5%)                 | 8 (19.1%)                  | 3 (14.3%)                  | 0.74   |
| Myalgia                                                                                       | 17 (27.0%)                 | 12 (28.6%)                 | 5 (23.8%)                  | 0.77   |
| Diarrhea                                                                                      | 8 (12.7%)                  | 6 (14.3%)                  | 2 (9.5%)                   | 0.71   |
| Shortness of breath                                                                           | 27 (42.9%)                 | 14 (33.3%)                 | 13 (61.9%)                 | 0.06   |
| <b>Illness severity at the time of favipiravir initiation</b>                                 |                            |                            |                            |        |
| NEWS2 score, median (range)                                                                   | 5 (0–16)                   | 4 (0–11)                   | 5 (0–16)                   | 0.003  |
| Six-point disease severity scale, median (range)                                              | 2.5 (1–5)                  | 2 (1–4)                    | 3 (2–5)                    | <0.001 |
| 1 – No O <sub>2</sub> -supplementation with O <sub>2</sub> -saturation of >94%                | 4 (6.4%)                   | 4 (6.4%)                   | 0 (0)                      | <0.001 |
| 2 – No O <sub>2</sub> -supplementation with O <sub>2</sub> -saturation of ≤94%                | 23 (36.4%)                 | 21 (50.0%)                 | 2 (9.5%)                   |        |
| 3 –Requiring O <sub>2</sub> -supplementation                                                  | 28 (44.4%)                 | 16 (40.1%)                 | 12 (57.1%)                 |        |
| 4 –Requiring high-flow O <sub>2</sub> -supplementation or non-invasive mechanical ventilation | 4 (6.4%)                   | 1 (2.4%)                   | 3 (14.3%)                  |        |
| 5 –Requiring invasive mechanical ventilation and/or extracorporeal membrane oxygenation       | 4 (6.4%)                   | 0 (0%)                     | 4 (19.1%)                  |        |
| <b>Baseline laboratory values*</b>                                                            |                            |                            |                            |        |
| Hemoglobin, median (range), (mg/dl)                                                           | 14.0 (8.0–18.0)            | 14.0 (9.0–17.0)            | 13.5 (8.0–18.0)            | 0.48   |
| White blood cell count, median (range), (cell/mm <sup>3</sup> )                               | 5735<br>(2910–41300)       | 5420<br>(2910–41300)       | 6810<br>(3180–15750)       | 0.03   |
| Serum creatinine, median (range), (mg/dl)                                                     | 0.9 (0.3–22.9)<br>(n = 58) | 0.9 (0.4–22.9)<br>(n = 27) | 0.9 (0.33–5.1)<br>(n = 21) | 0.67   |
| Serum albumin, median (range), (mg/dl)                                                        | 4.0 (1.8–4.9)<br>(n = 53)  | 4.2 (1.8–5.0)<br>(n = 33)  | 3.5 (2.6–4.1)<br>(n = 20)  | 0.002  |
| Serum lactate dehydrogenase, median (range), (mg/dl)                                          | 404 (145–1094)<br>(n = 30) | 382 (145–567)<br>(n = 17)  | 453 (313–1094)<br>(n = 13) | 0.03   |

| <b>Indication of favipiravir therapy</b>                            |                  |                  |                  |        |
|---------------------------------------------------------------------|------------------|------------------|------------------|--------|
| Abnormal chest imagining only                                       | 26 (41.3%)       | 24 (57.1%)       | 2 (9.5%)         | <0.001 |
| Required O <sub>2</sub> -supplementation only                       | 3 (4.7%)         | 2 (4.7%)         | 1 (4.8%)         |        |
| Abnormal chest imaging and required O <sub>2</sub> -supplementation | 34 (54.0%)       | 16 (38.1%)       | 18 (85.7%)       |        |
| <b>Favipiravir regimen</b>                                          |                  |                  |                  |        |
| Dose per bw, median (range), mg/kg/day                              |                  |                  |                  |        |
| Loading dose                                                        | 47.4 (29.1–71.1) | 49.2 (29.1–62.7) | 45.7 (29.6–71.1) | 0.47   |
| Maintenance dose                                                    | 17.9 (10.9–26.7) | 18.5 (10.9–23.5) | 17.1 (11.1–26.7) | 0.37   |
| Potentially sub-therapeutic dose                                    |                  |                  |                  |        |
| Loading dose of ≤45 MKD                                             | 21 (33.3%)       | 11 (26.2%)       | 10 (47.6%)       | 0.10   |
| Maintenance dose of ≤15 MKD                                         | 48 (76.2%)       | 33 (78.6%)       | 15 (71.4%)       | 0.55   |
| Duration of therapy, median (range), day                            | 12 (2–17)        | 11.5 (2–16)      | 12 (2–17)        | 0.02   |
| <b>Other medications used**</b>                                     |                  |                  |                  |        |
| Any chloroquine-based agent                                         | 62 (98.4%)       | 41 (97.6%)       | 21 (100%)        | 1.00   |
| Hydroxychloroquine                                                  | 54 (85.7%)       | 36 (85.7%)       | 18 (85.7%)       | 1.00   |
| Chloroquine                                                         | 14 (22.2%)       | 8 (19.1%)        | 6 (28.6%)        | 0.52   |
| Any protease inhibitor                                              | 61 (96.8%)       | 40 (95.2%)       | 21 (100,0%)      | 0.55   |
| Darunavir/ritonavir                                                 | 51 (81.0%)       | 35 (83.3%)       | 16 (76.2%)       | 0.51   |
| Lopinavir/ritonavir                                                 | 22 (34.9%)       | 13 (31.0%)       | 9 (42.9%)        | 0.26   |
| Azithromycin                                                        | 31 (49.2%)       | 17 (40.5%)       | 14 (66.7%)       | 0.06   |
| Steroid                                                             | 8 (12.7%)        | 5 (11.9%)        | 3 (14.3%)        | 1.00   |
| Tocilizumab                                                         | 4 (6.4%)         | 1 (2.4%)         | 3 (14.3%)        | 0.10   |

384 **Note.** \*Earliest results of a test obtained within the first 7 days of admission (missing data was  
385 replaced by the mean value of the variable)

386 \*\* Medications used within 2 days before or after the initiation of favipiravir therapy

387

388

389

390 **Table 2.** Hospital course and treatment outcomes

| <b>Variables</b>                                                         | <b>All patients (n = 63)</b> |
|--------------------------------------------------------------------------|------------------------------|
| <b>Clinical improvement</b>                                              |                              |
| Day-7 clinical improvement                                               | 42 (66.7%)                   |
| Patients who did not require O <sub>2</sub> -supplementation (n = 27)    | 25 (92.6%)                   |
| Patients who required O <sub>2</sub> -supplementation (n = 36)           | 17 (47.2%)                   |
| Day-14 clinical improvement                                              | 54 (85.7%)                   |
| Patients who did not require O <sub>2</sub> -supplementation (n = 27)    | 27 (100.0%)                  |
| Patients who required O <sub>2</sub> -supplementation (n = 36)           | 27 (75.0%)                   |
| Day-28 clinical improvement                                              | 57 (90.5%)                   |
| Patients who did not require O <sub>2</sub> -supplementation (n = 27)    | 27 (100.0%)                  |
| Patients who required O <sub>2</sub> -supplementation (n = 36)           | 30 (83.3%)                   |
| ICU duration, median (range), day                                        | 0 (0–46)                     |
| Required invasive mechanical ventilation or ECMO* during hospitalization | 8 (12.7%)                    |
| Before initiation of favipiravir                                         | 4 (6.3%)                     |
| After initiation of favipiravir                                          | 4 (6.3%)                     |
| 14-day mortality rate                                                    | 1 (1.6%)                     |
| 28-day mortality rate                                                    | 3 (4.8%)                     |
| In-hospital mortality rate                                               | 5 (7.9%)                     |
| Length of hospital stay, median (range), day                             | 15 (2–47)                    |
| <b>Adverse drug reactions</b>                                            | 39 (61.9%)                   |
| Diarrhea                                                                 | 34 (54.0%)                   |
| Hepatitis                                                                | 4 (6.4%)                     |
| QT interval prolongation                                                 | 4 (6.4%)                     |
| Nausea and vomit                                                         | 5 (7.9%)                     |
| Superimposed bacterial infection                                         | 8 (12.7%)                    |

391 **Note.** \*ECMO: extracorporeal membrane oxygenation

392 **Table 3.** Factors associated with Day-7 clinical improvement

| <b>Variables</b>                | <b>Unadjusted Odd Ratio</b><br>[95%CI ; <i>p</i> -value] | <b>Adjusted Odd Ratio</b><br>[95%CI ; <i>p</i> -value] |
|---------------------------------|----------------------------------------------------------|--------------------------------------------------------|
| Age, year                       | 0.95 [0.92 -0.99; <i>p</i> =0.02]                        | 0.94 [0.89–0.99; <i>p</i> =0.04]                       |
| Baseline NEWS2 score            | 0.77 [ 0.65-0.92; <i>p</i> =0.004]                       | 0.64 [0.47 – 0.88; <i>p</i> =0.006]                    |
| Low loading dose of favipiravir | 0.39 [0.13-1.17; <i>p</i> =0.09]                         | 0.04 [0.005–0.41; <i>p</i> =0.006]                     |

393

394

395

396

397

398

399

400

401

402

403

404

405

406

407

408

409

410

411

412

413

414 **Figure 1.** Rate of clinical improvement on Day 7, Day 14, and Day 28 of favipiravir therapy,  
415 stratified by the requirement for O<sub>2</sub>-supplementation.

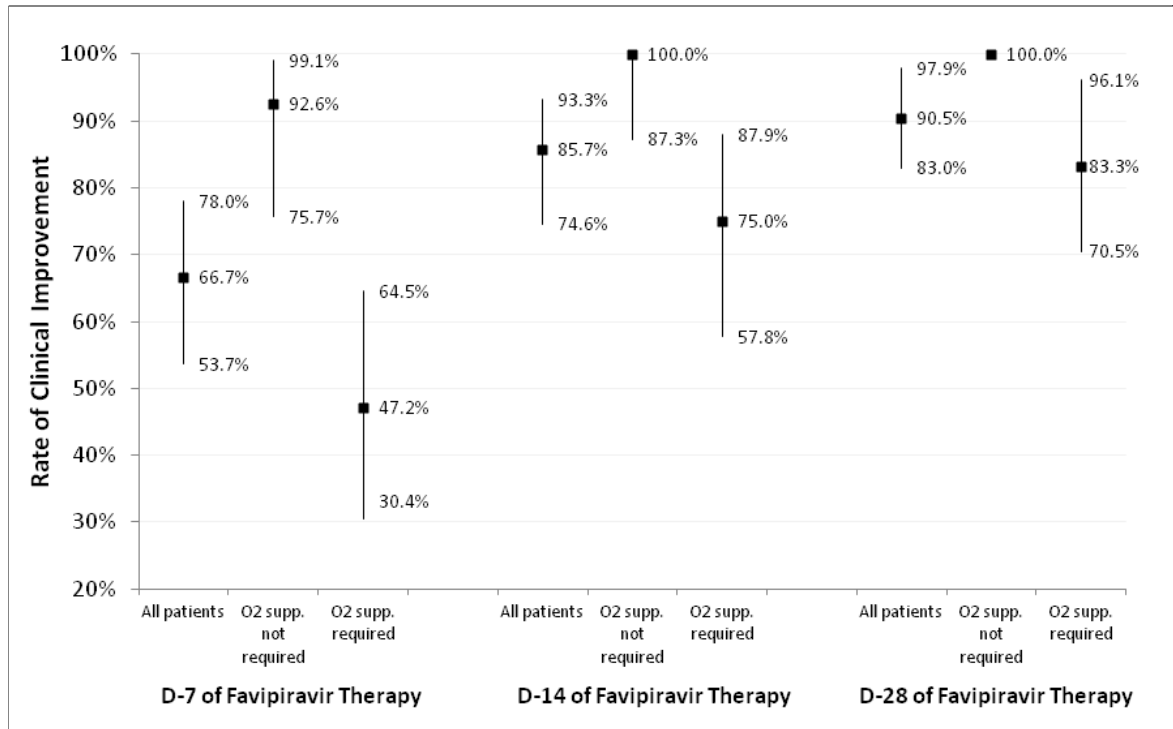

416
